# Supplementary material
Source: Springer Nature journal article supplement (https://www.springermedizin.de/resource/supplementary/12913_2008_1020_MOESM5_ESM.pdf/9536152)

## C1.Importance / preferences: direct questioning

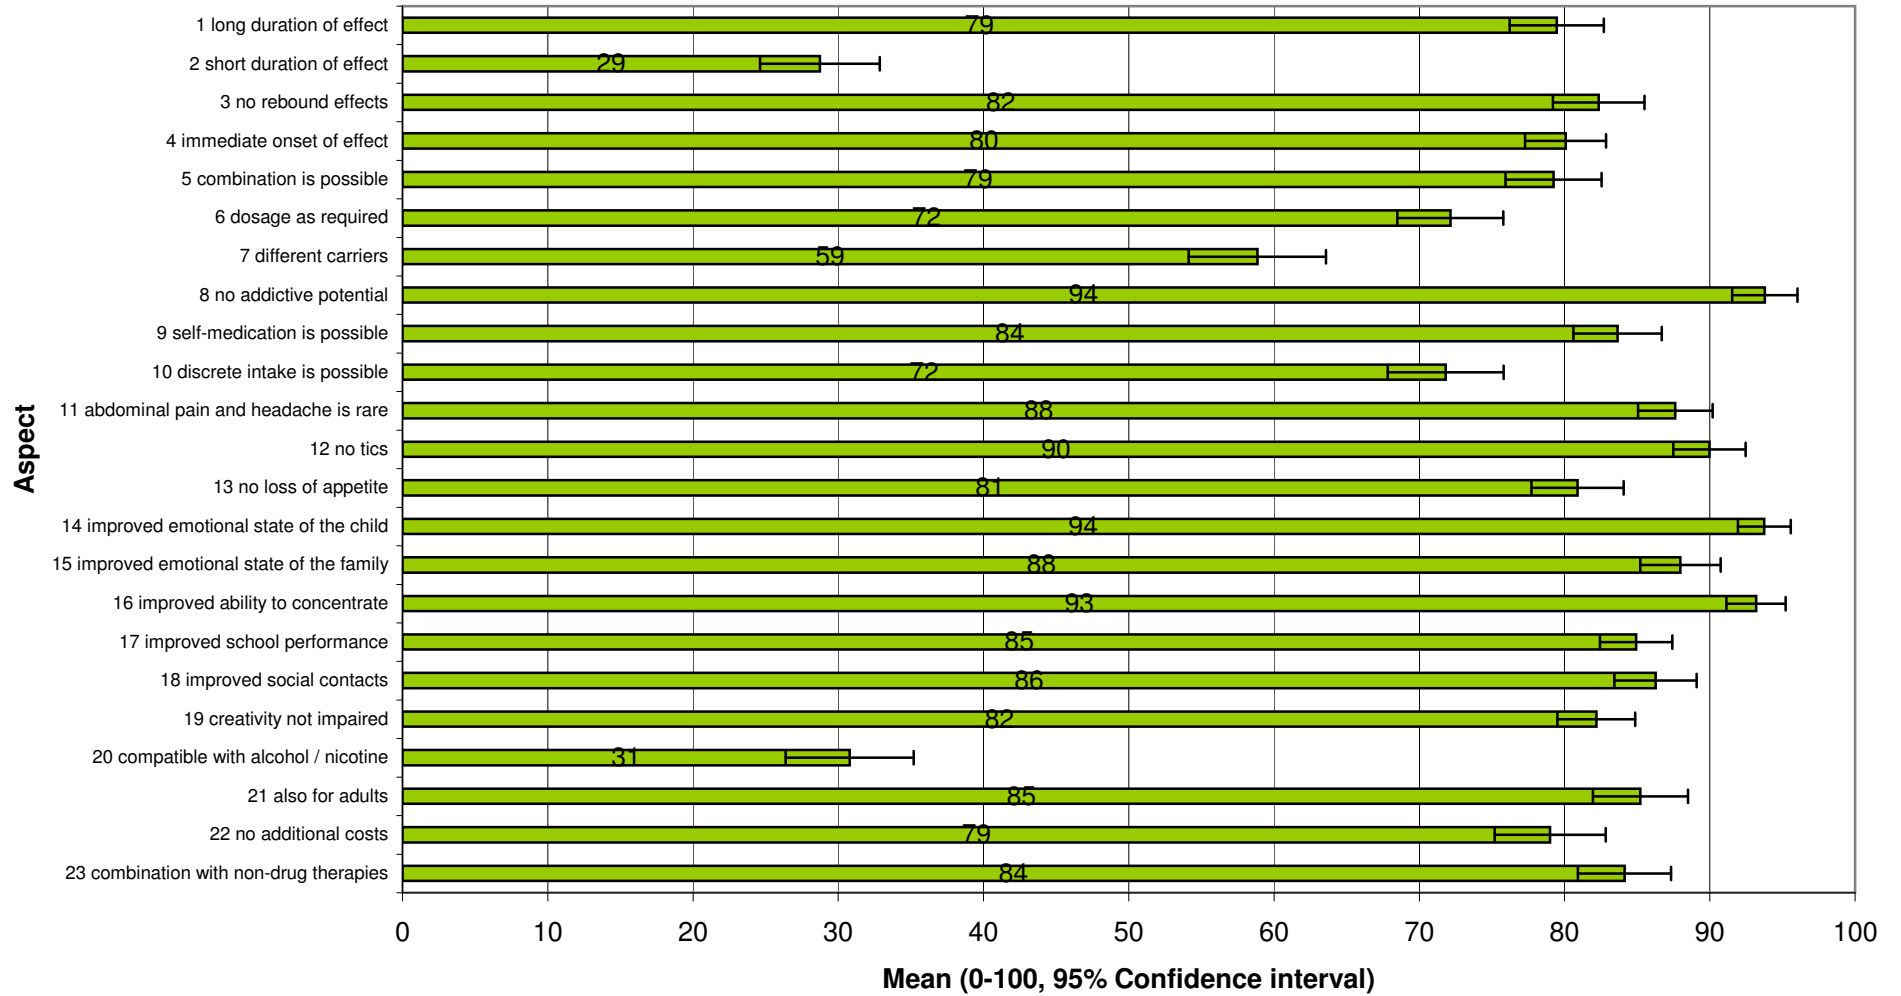

Supplement: MOESM5 [file 9536152]
